# Supplementary material for: Source apportionment of ambient particle number concentrations in central Los Angeles using positive matrix factorization (PMF)
Source: Copernicus journal article supplement (doi:10.5194/acp-16-4849-2016), 2016-04-20
Supplement: Supplementary file 1 [file acp-16-4849-2016-supplement.pdf]

Supplement of Atmos. Chem. Phys., 16, 4849–4866, 2016  
<http://www.atmos-chem-phys.net/16/4849/2016/>  
doi:10.5194/acp-16-4849-2016-supplement  
© Author(s) 2016. CC Attribution 3.0 License.

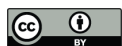

*Supplement of*

## **Source apportionment of ambient particle number concentrations in central Los Angeles using positive matrix factorization (PMF)**

**Mohammad Hossein Sowlat et al.**

*Correspondence to:* Constantinos Sioutas (sioutas@usc.edu)

The copyright of individual parts of the supplement might differ from the CC-BY 3.0 licence.

## 1 **Signal-to-noise ratio calculation in PMF 5.0**

2 In the previous versions of the PMF model, S/N ratio was basically calculated by dividing the sum of  
3 concentration values by sum of uncertainty values, using the following equation (Paatero et al., 2014):

$$4 \left( \frac{S}{N_j} \right) = \sqrt{\frac{\sum_{i=1}^n (x_{ij} - s_{ij})^2}{\sum_{i=1}^n s_{ij}^2}} \quad (8)$$

5 The major disadvantage associated with this method of S/N calculation was that it would have resulted in  
6 artificially high S/N values for a species having a number of very high concentration data points. In such  
7 cases, the S/N ratios might have even exceeded that of a species having consistently lower signals.  
8 Additionally, a few missing values for a species would also have led to very low S/N ratios. In the current  
9 version, to resolve these issues, the model only includes concentration values for the signal portion that  
10 exceed the uncertainty value. If the concentration is below the uncertainty value, it is considered to have  
11 no signal (Paatero et al., 2014):

$$12 d_{ij} = 0 \quad \text{if } x_{ij} \leq S_{ij} \quad (9)$$

13 where,  $d_{ij}$  is the difference between the concentration and the uncertainty value.

14 However, if the concentration exceeds the uncertainty value, the model uses the difference between the  
15 concentration and the uncertainty value as the signal:

$$16 d_{ij} = \left( \frac{x_{ij} - S_{ij}}{S_{ij}} \right) \quad \text{if } x_{ij} > S_{ij} \quad (10)$$

17 Then, the S/N ratio is calculated using the following equation:

$$18 \left( \frac{S}{N} \right)_j = 1/n \sum_{i=1}^n d_{ij} \quad (11)$$

Table S1. Contribution ( $\#/cm^3$ ) of each of the PMF-resolved factors in different months of the study period.

| Year/<br>Month | Statistics     | Nucleation | Traffic 1 | Traffic 2 | Urban<br>Background<br>Aerosol | Secondary<br>Aerosol | Soil/road<br>dust |
|----------------|----------------|------------|-----------|-----------|--------------------------------|----------------------|-------------------|
| Aug<br>2014    | Geometric Mean | 1477.65    | 525.74    | 440.87    | 116.47                         | 176.46               | 293.48            |
|                | Standard Error | 55.24      | 148.05    | 56.54     | 12.42                          | 7.73                 | 9.27              |
| Sep<br>2014    | Geometric Mean | 1257.41    | 700.42    | 741.34    | 109.79                         | 85.57                | 318.03            |
|                | Standard Error | 55.89      | 79.27     | 35.01     | 8.67                           | 8.62                 | 5.64              |
| Oct<br>2014    | Geometric Mean | 949.96     | 1836.26   | 1546.09   | 866.6                          | 143.52               | 247.52            |
|                | Standard Error | 43.06      | 104.47    | 75.18     | 55.18                          | 12.98                | 4.39              |
| Nov<br>2014    | Geometric Mean | 591.92     | 3249.86   | 1741.39   | 840.13                         | 61.65                | 5.66              |
|                | Standard Error | 65.64      | 119.02    | 102.43    | 38.39                          | 7.92                 | 0.95              |
| Dec<br>2014    | Geometric Mean | 512.78     | 3148.09   | 1903.79   | 1645.71                        | 131.36               | 4.72              |
|                | Standard Error | 42.72      | 114.19    | 115.44    | 99.55                          | 17.77                | 0.28              |
| Jan<br>2015    | Geometric Mean | 508.66     | 4169.93   | 2604.66   | 1985.96                        | 175.25               | 18.71             |
|                | Standard Error | 55.11      | 193.48    | 138.3     | 124.64                         | 36.35                | 3.58              |
| Feb<br>2015    | Geometric Mean | 733.69     | 2648.81   | 1314.48   | 1008.57                        | 146.59               | 121.1             |
|                | Standard Error | 43.84      | 121.45    | 100.14    | 64.7                           | 28.79                | 3.75              |
| Mar<br>2015    | Geometric Mean | 768        | 4256.31   | 2101.16   | 599.71                         | 16.39                | 71.29             |
|                | Standard Error | 80.46      | 200.86    | 182.77    | 58.37                          | 3.43                 | 8.99              |
| Aug<br>2015    | Geometric Mean | 1030.21    | 1074.72   | 1062.54   | 216.07                         | 147.89               | 273.64            |
|                | Standard Error | 99.28      | 146.11    | 115.31    | 28.42                          | 11.75                | 8.91              |

Figure S1. The number size distributions as well as the auxiliary variables profiles for each of the factors resolved by the PMF for the scenario including POC-SOC data.

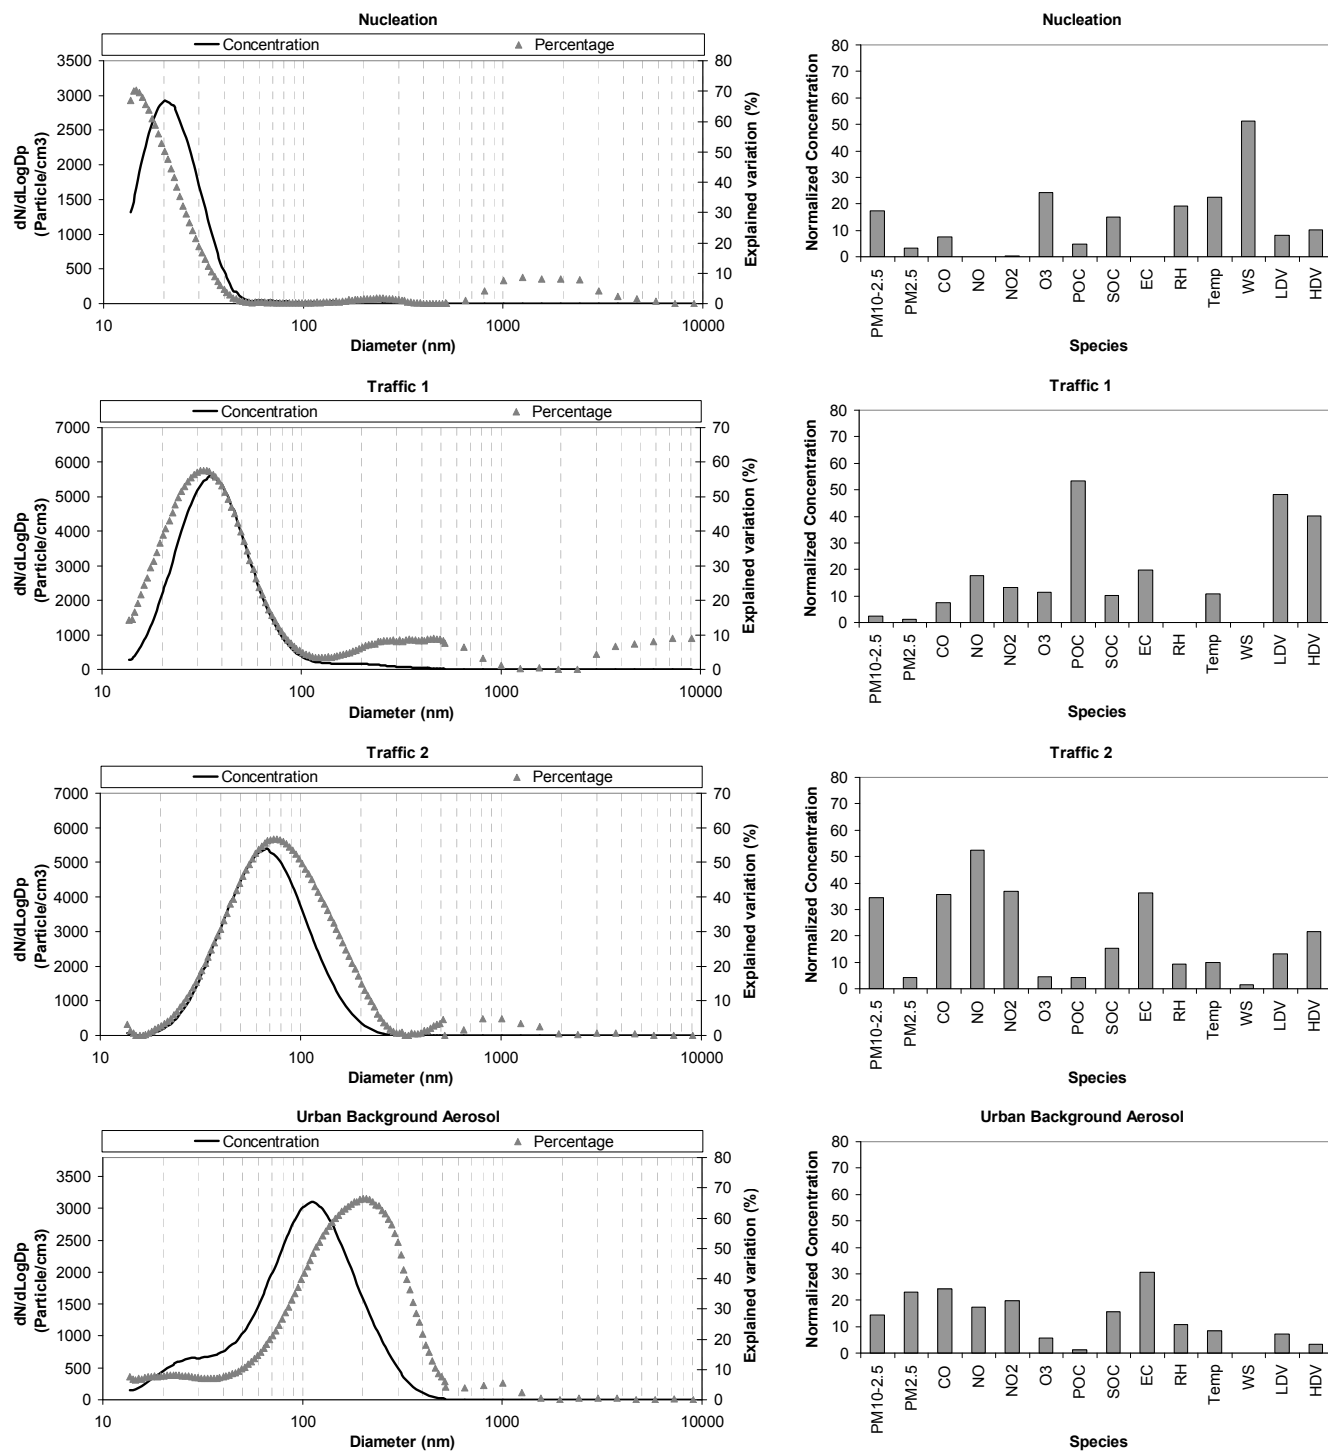

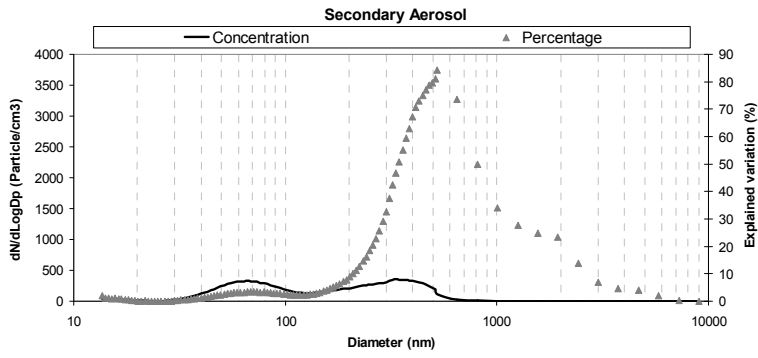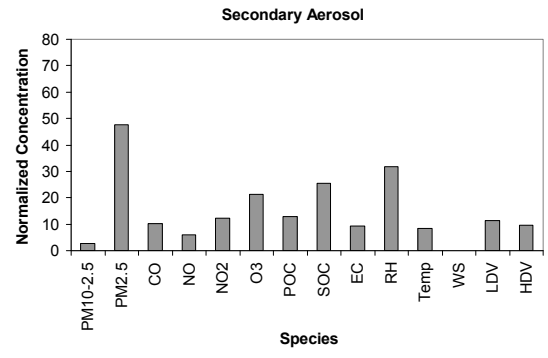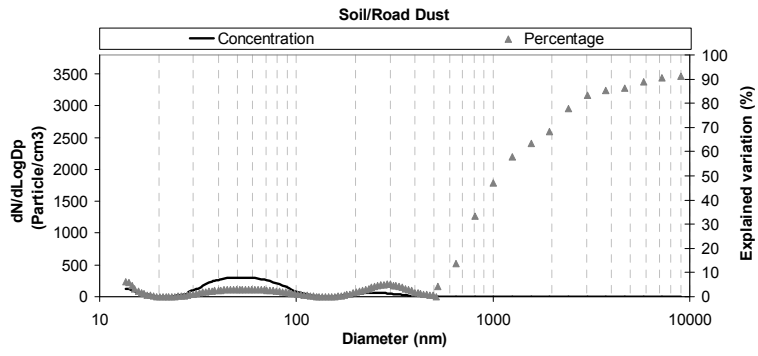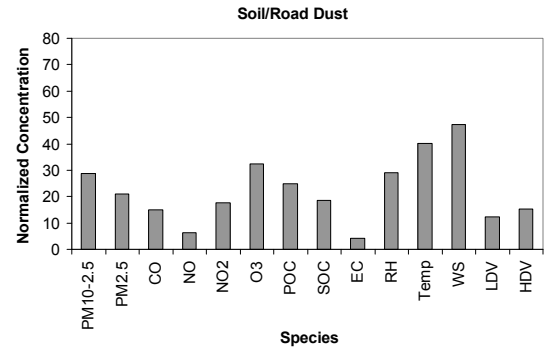

Figure S2. Correlation between the measured vs. PMF-predicted total number concentrations (particles/cm<sup>3</sup>) for the entire sampling period.

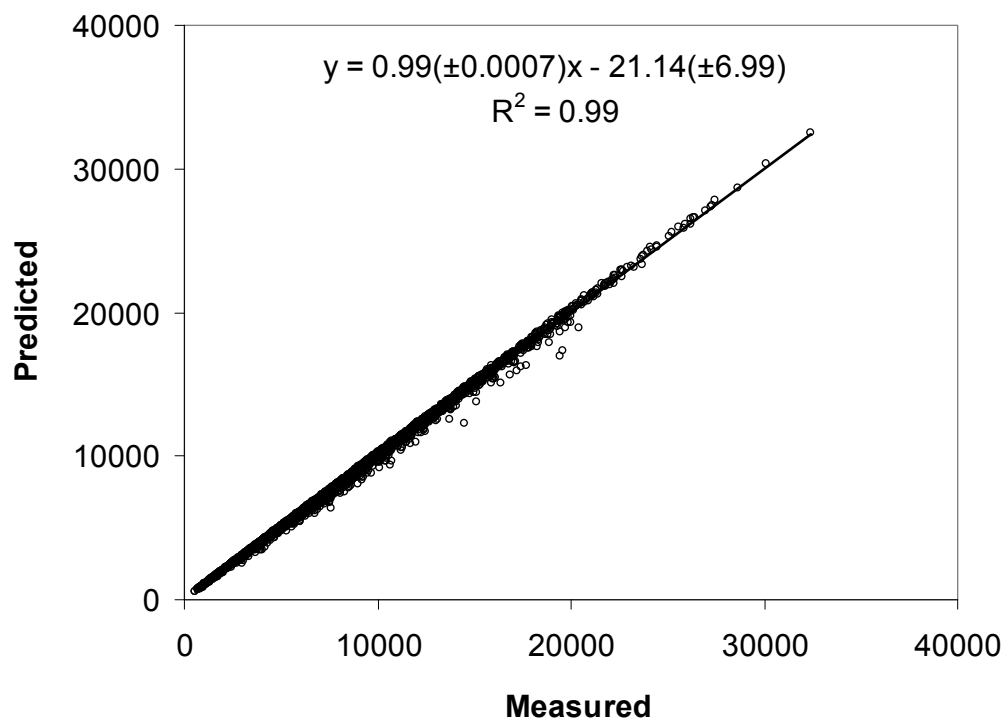

## References

Paatero, P., Eberly, S., Brown, S. G., and Norris, G. A.: Methods for estimating uncertainty in factor analytic solutions, *Atmos. Meas. Tech.*, 7, 781-797, 2014.
